# Supplementary material for: Autonomous folding in the membrane proximal HIV peptide gp41659–671: pH tuneability at micelle interfaces
Source: Royal Society of Chemistry journal article supplement (doi:10.1039/c0cp01502d), 2010-11-08
Supplement: c0cp01502d.pdf [file c0cp01502d.pdf]

**Autonomous folding in the membrane  
proximal HIV peptide gp41<sub>659–671</sub> : pH  
tuneability at micelle interfaces. -  
Supplementary Information**

Gregor et al

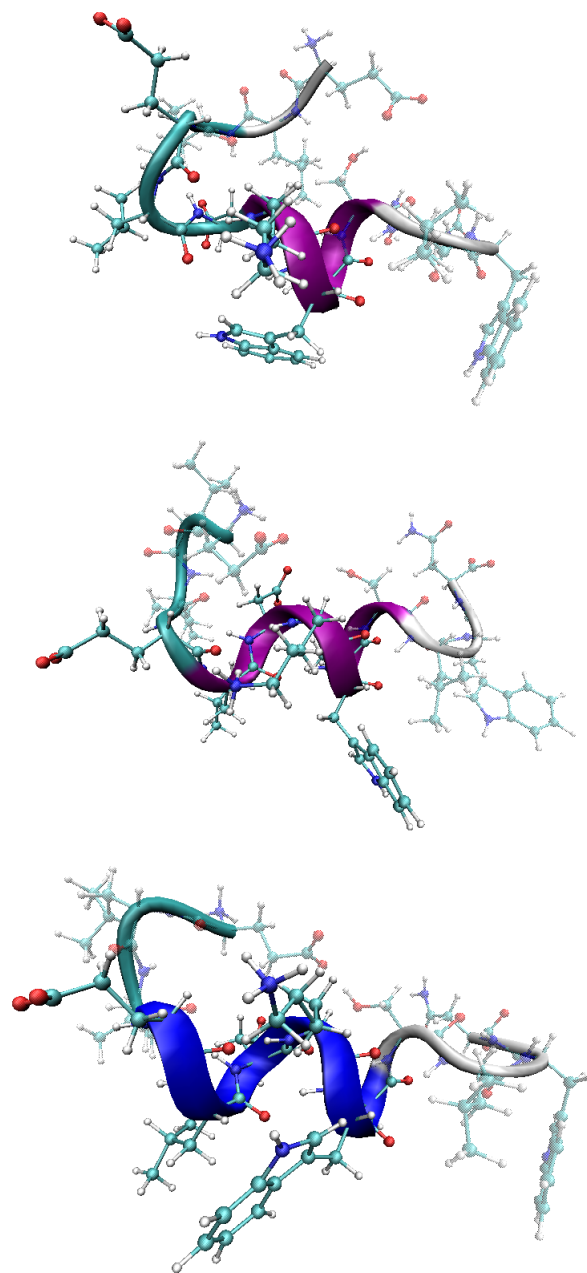

Figure 1: Secondary Structure of gp41 after equilibration: CHARMM (top), AMBER-ff03 (middle), AMBER-ff99SB (bottom).

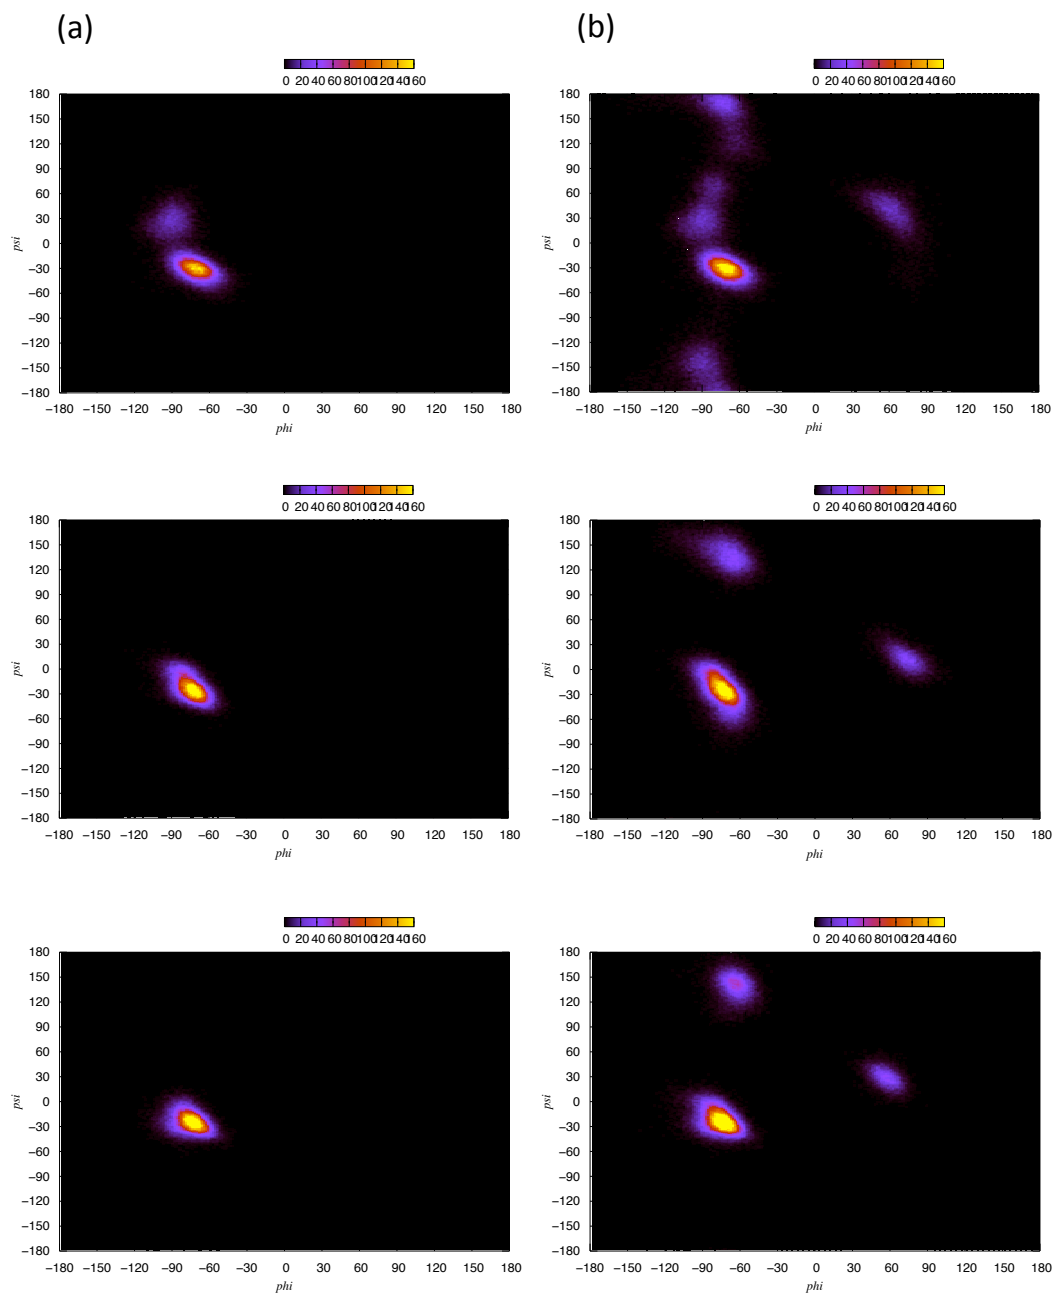

Figure 2: Ramachandran plots of the (a) epitope and (b) full sequence over the initial 1ns: CHARMM (top), AMBER-ff03 (middle), AMBER-ff99SB (bottom)

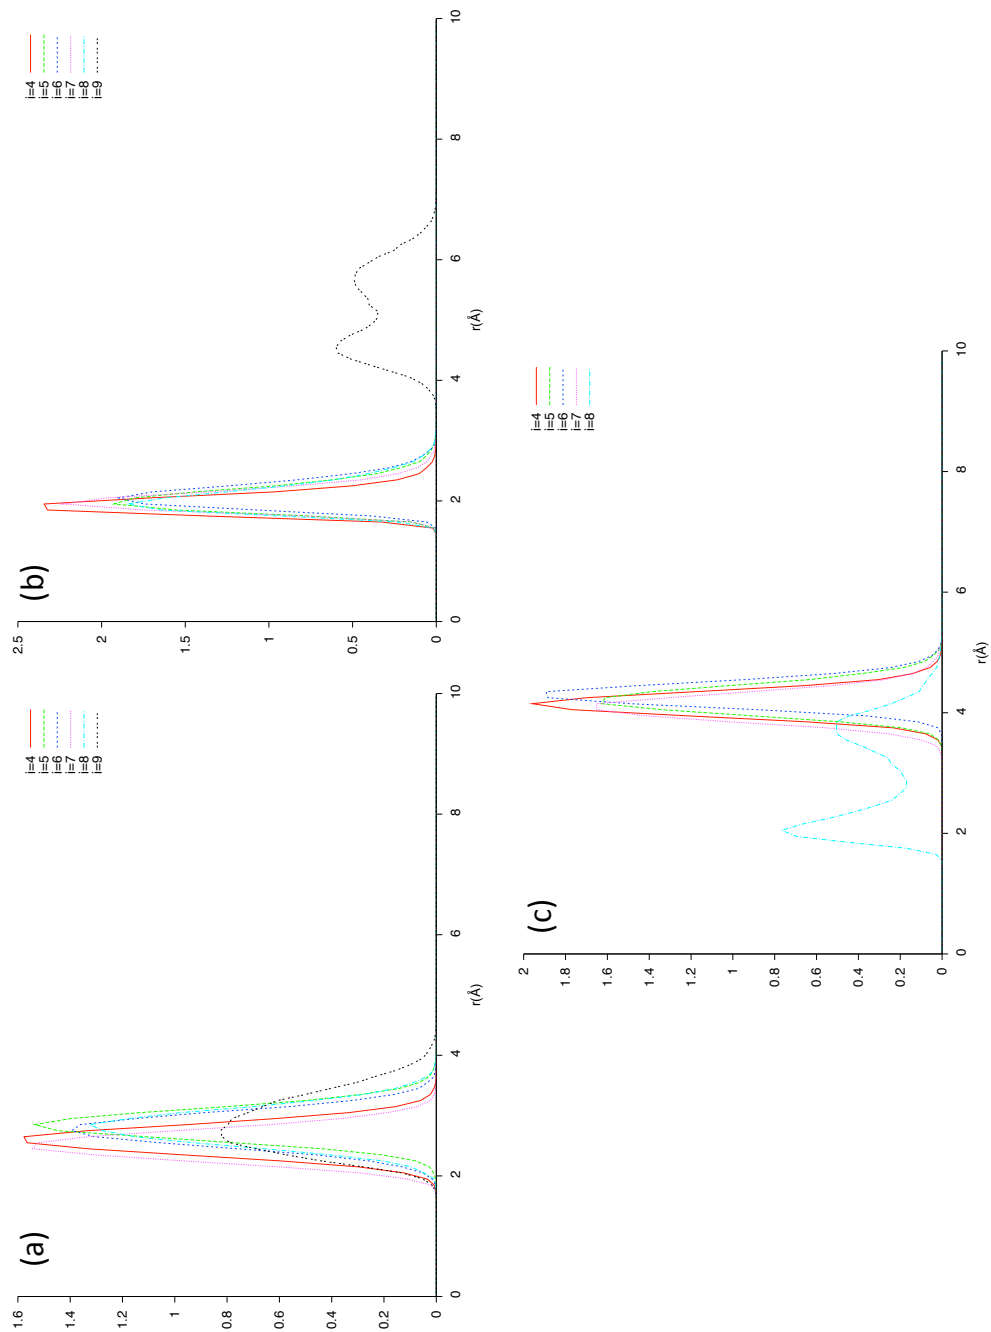

Figure 3: Bond distribution over last 5ns of simulation using CHARMM force-field: (a)  $i,i+3$  bonding, (b)  $i,i+4$  bonding, (c)  $i,i+5$  bonding

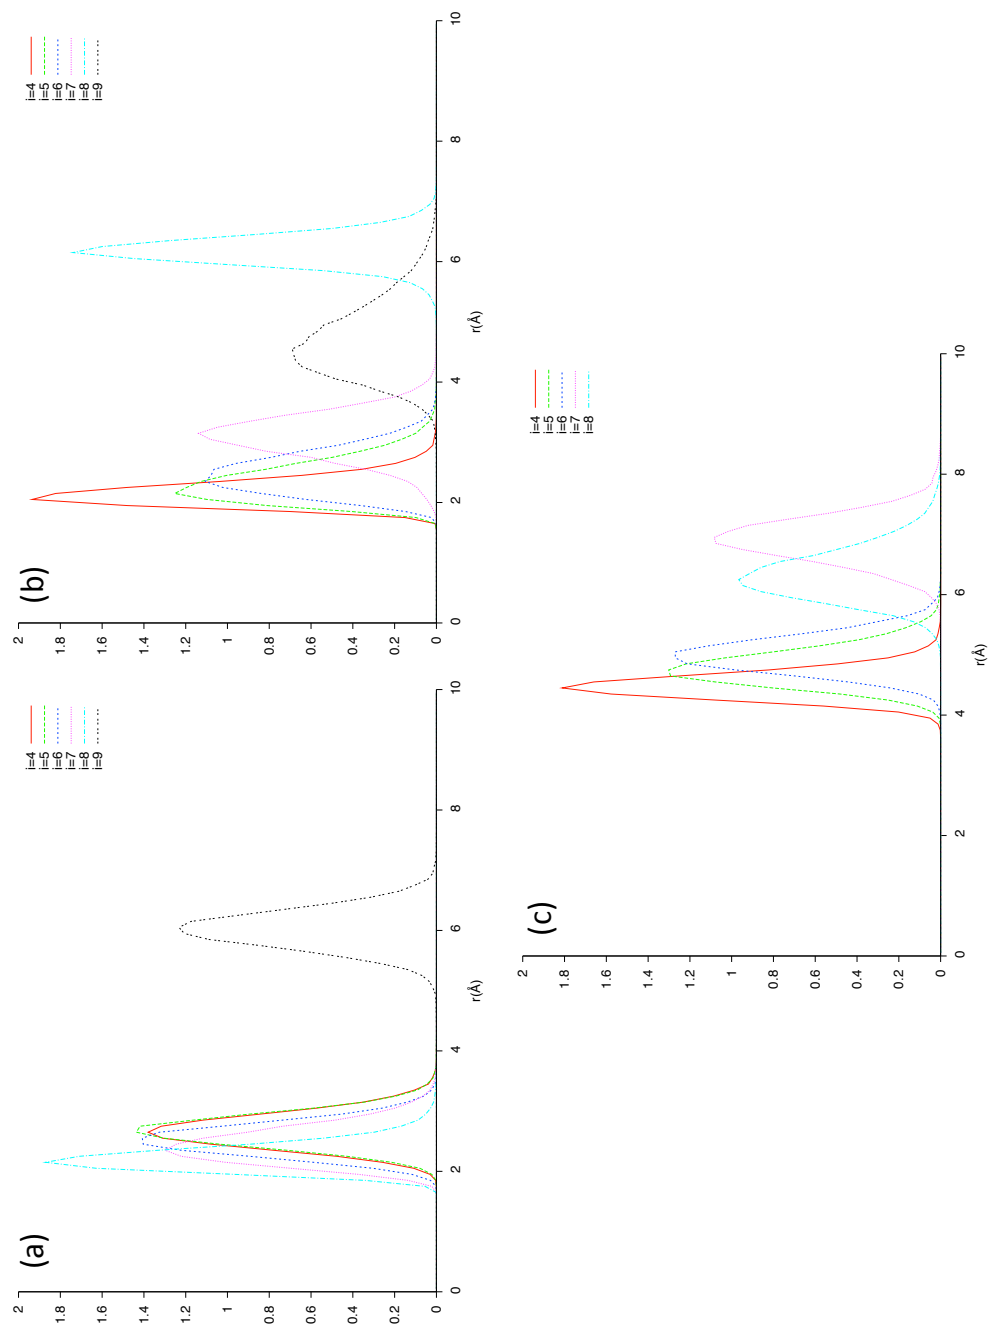

Figure 4: Bond distribution over last 5ns of simulation using AMBER-ff03 force-field: (a)  $i,i+3$  bonding, (b)  $i,i+4$  bonding, (c)  $i,i+5$  bonding

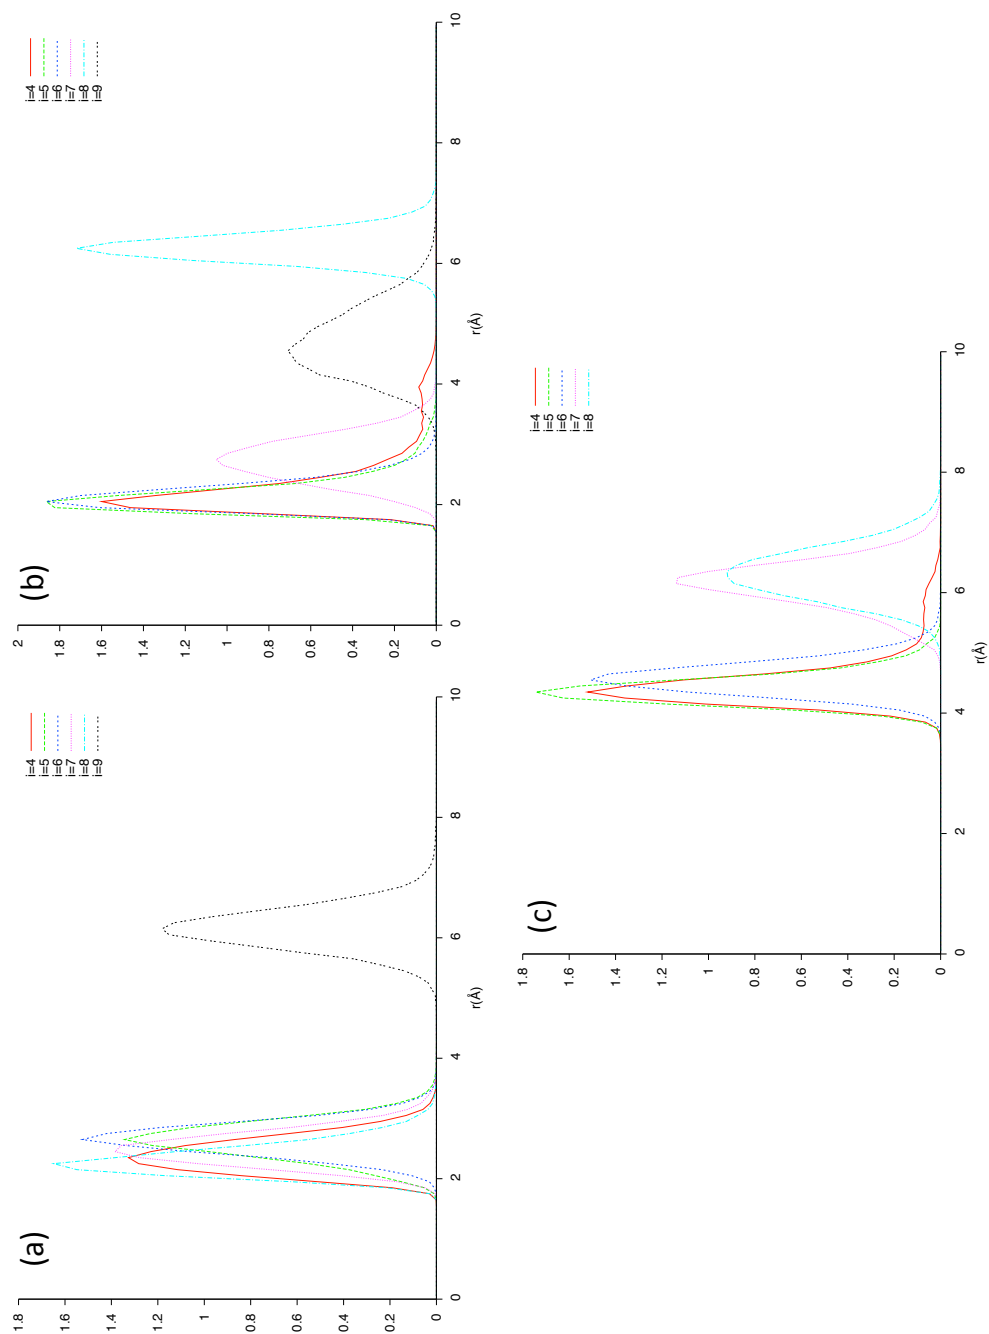

Figure 5: Bond distribution over last 5ns of simulation using AMBER-ff99SB force-field: (a)  $i,i+3$  bonding, (b)  $i,i+4$  bonding, (c)  $i,i+5$  bonding

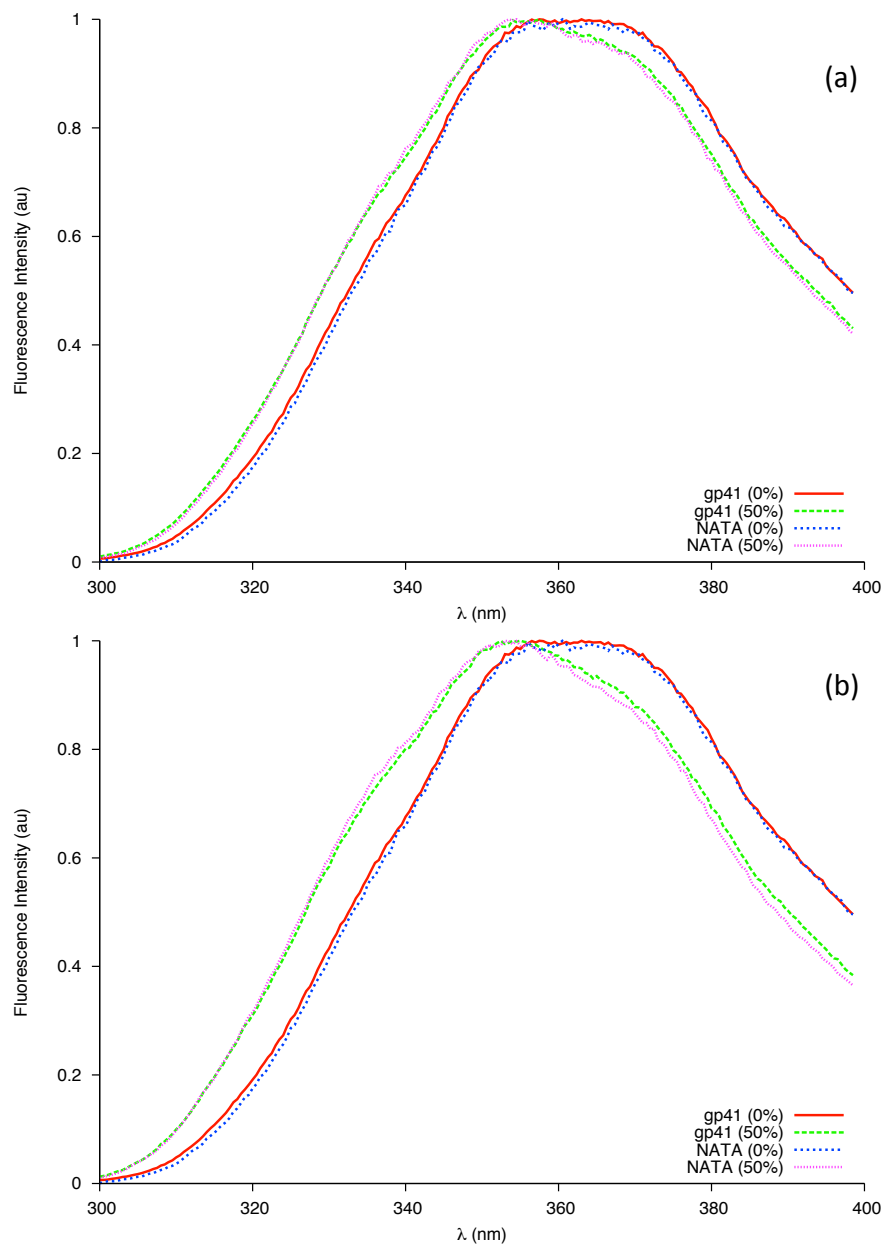

Figure 6: Changes to the intrinsic Trp fluorescence of the gp41 peptide and  $10\mu\text{M}$  NATA control due to the presence of (a) 50% Methanol and (b) 50% Acetonitrile.

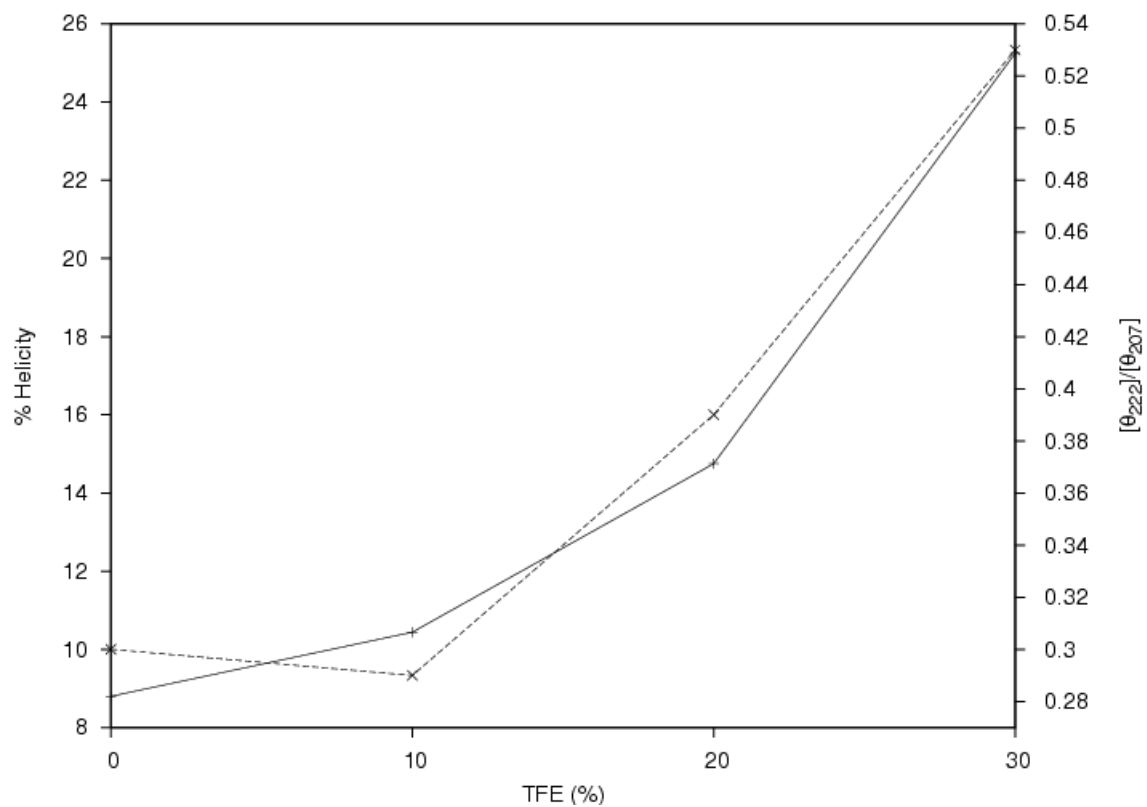

Figure 7: Helical content (solid line) and ratio of  $[\theta_{222}]/[\theta_{207}]$  (dotted line) of 0.04mM gp41<sub>659–671</sub> over various concentrations of TFE.



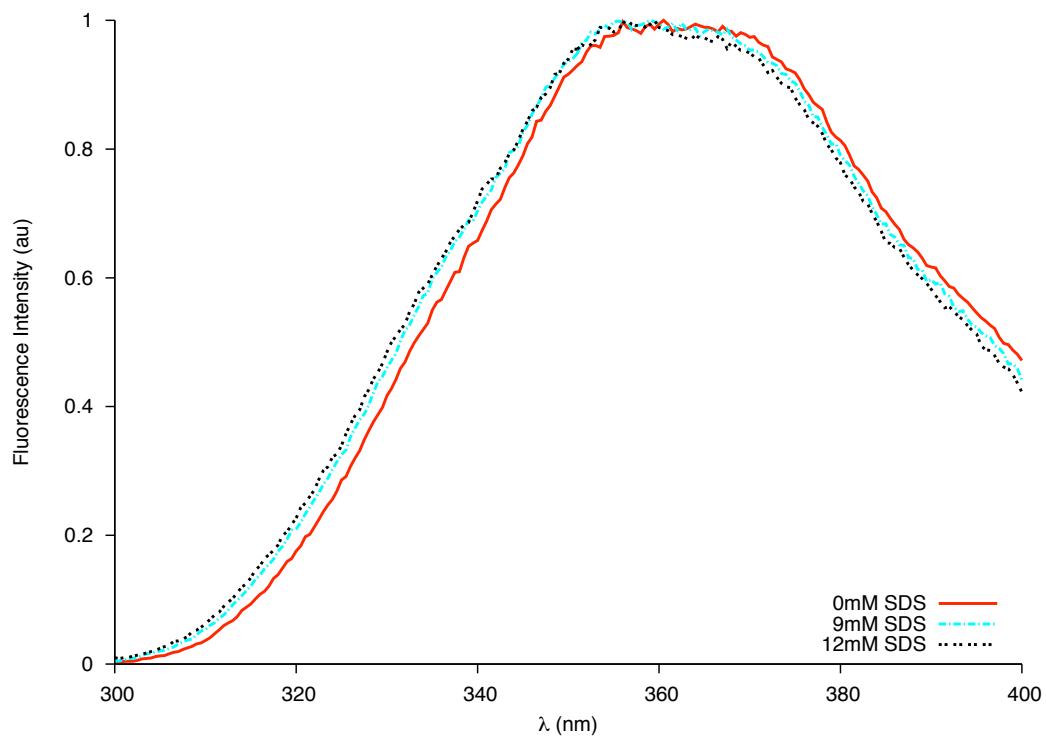

Figure 8: Intrinsic Trp fluorescence of 10 $\mu$ M NATA in the presence of different concentrations of SDS below (3mM) and above (6, 9, 12 mM) the cmc.

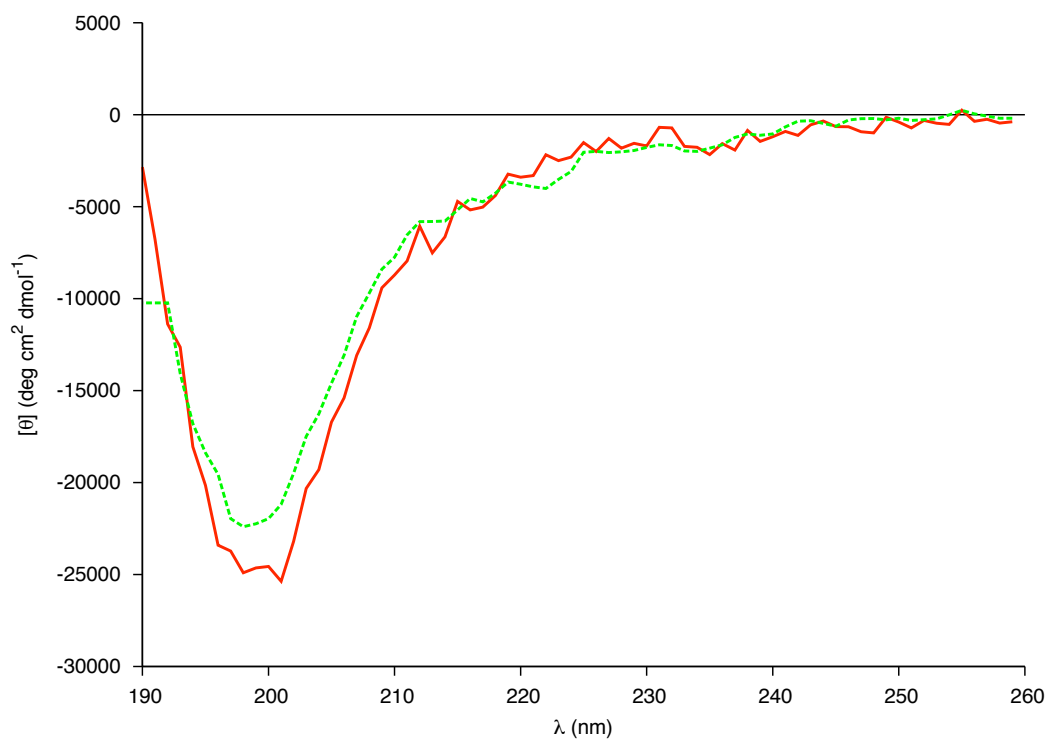

Figure 9: Changes in the far-UV CD spectra of 0.04 mM peptide in 20mM Phosphate buffer at pH 6.83 (solid line) and pH 2.14 (dashed line).

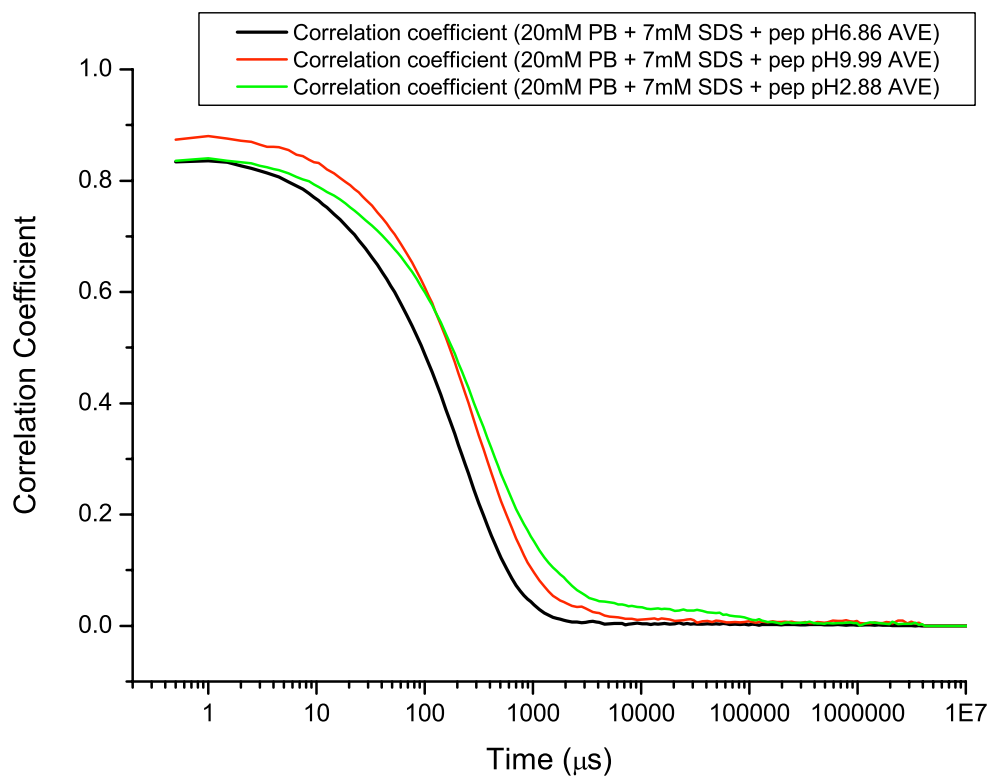

Figure 10: Correlogram of a solution of 7mM SDS in 20mM PB at different pH: demonstrating that under all conditions they are above the cmc

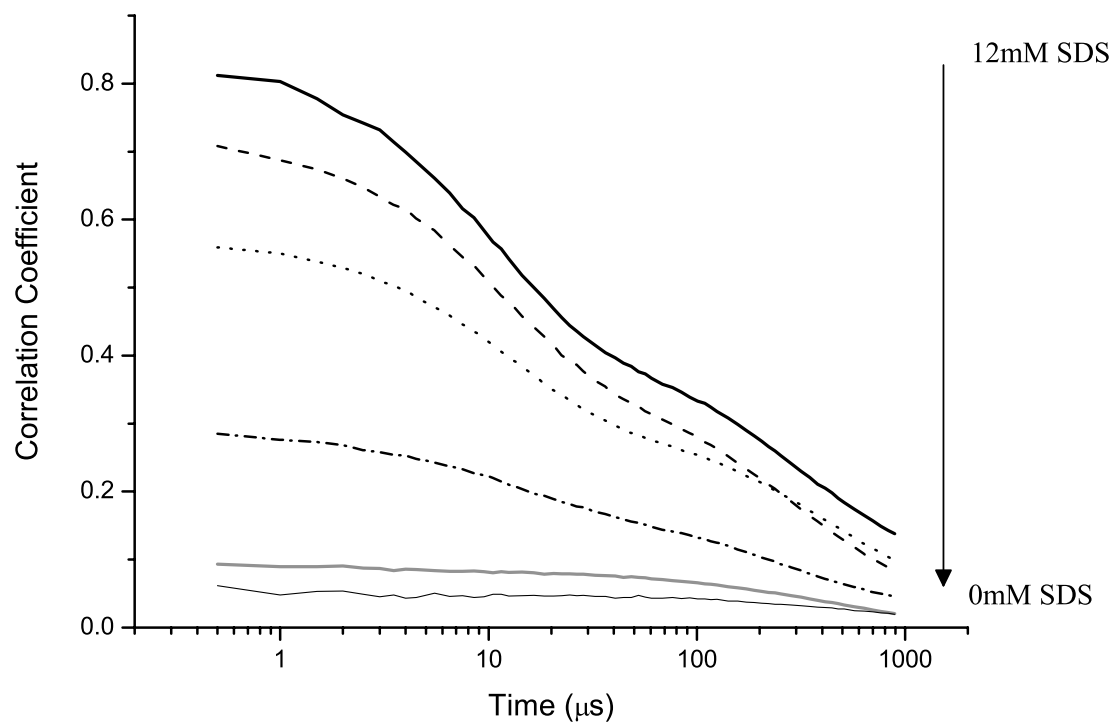

Figure 11: Correlograms of solutions at different SDS concentrations.
